# Supplementary material for: Outcomes of Nonagenarians with Acute Myocardial Infarction with or without Coronary Intervention
Source: MDPI journal article supplement (doi:10.3390/jcm11061593), 2022-03-14
Supplement: s1 [file s1]

**Table S1.** Clinical characteristics at the time of hospital visit of participants.

| <b>Characteristics</b>           | <b>PCI group</b> | <b>No-PCI group</b> | <b><i>p</i>-value</b> |
|----------------------------------|------------------|---------------------|-----------------------|
|                                  | <b>(n = 320)</b> | <b>(n = 147)</b>    |                       |
| <b>Age, years</b>                | 91.99 ± 2.03     | 92.14 ± 2.21        | 0.485                 |
| <b>Atypical anginal pain</b>     | 78 (24.5)        | 68 (46.6)           | <b>&lt;0.001</b>      |
| <b>EMS utilization</b>           | 61 (19.1)        | 28 (19.0)           | 0.997                 |
| <b>Onset-to-door time ≥ 12 h</b> | 82 (25.8)        | 45 (30.6)           | 0.277                 |
| <b>Off-hour presentation</b>     | 175 (54.7)       | 83 (56.5)           | 0.720                 |

Values are presented as number (percentage) for categorical values and means ± standard deviation for continuous variables.

EMS, emergency medical service; PCI, percutaneous coronary intervention.
