# Supplementary material for: Outcomes of Nonagenarians with Acute Myocardial Infarction with or without Coronary Intervention
Source: MDPI journal article supplement (doi:10.3390/jcm11061593), 2022-03-14
Supplement: s1 [file s1]

**Table S2.** Coronary angiography and procedural characteristics in PCI-treated nonagenarian AMI patients.

| <b>Characteristics</b>                | <b>PCI group<br/>(n = 320)</b> |
|---------------------------------------|--------------------------------|
| <b>Transfemoral approach (%)</b>      | 187 (66.8)                     |
| <b>GPIIb/IIIa inhibitor use (%)</b>   | 26 (8.1)                       |
| <b>Thrombus aspiration</b>            | 47 (14.7)                      |
| <b>Infarct-related artery</b>         |                                |
| <b>LMCA (%)</b>                       | 7 (2.2)                        |
| <b>LAD (%)</b>                        | 156 (48.9)                     |
| <b>LCX (%)</b>                        | 42 (13.2)                      |
| <b>RCA (%)</b>                        | 114 (35.7)                     |
| <b>ACC/AHA lesion classification</b>  |                                |
| <b>Type A or B1 (%)</b>               | 32 (10.7)                      |
| <b>Type B2 or C (%)</b>               | 268 (89.3)                     |
| <b>Preprocedural TIMI 0-I (%)</b>     | 191 (62.2)                     |
| <b>Left main disease (%)</b>          | 13 (4.1)                       |
| <b>Multivessel disease (%)</b>        | 200 (63.1)                     |
| <b>Type of PCI</b>                    |                                |
| <b>Stent implantation (%)</b>         | 272 (85.1)                     |
| <b>Drug-eluting stents (%)</b>        | 228 (71.3)                     |
| <b>Bare metal stents (%)</b>          | 44 (13.8)                      |
| <b>Balloon angioplasty (%)</b>        | 16 (5.0)                       |
| <b>Others (%)</b>                     | 32 (10.0)                      |
| <b>Postprocedural TIMI II-III (%)</b> | 298 (97.1)                     |

|                                         |            |
|-----------------------------------------|------------|
| <b>Territories of revascularization</b> |            |
| <b>LMCA PCI (%)</b>                     | 17 (5.4)   |
| <b>LAD PCI (%)</b>                      | 206 (65.2) |
| <b>LCX PCI (%)</b>                      | 113 (35.8) |
| <b>RCA PCI (%)</b>                      | 160 (50.6) |
| <b>PCI results</b>                      |            |
| <b>Successful PCI</b>                   | 307 (95.9) |
| <b>Suboptimal or failed PCI</b>         | 13 (4.1)   |

Values are presented number and percentage.

ACC, American College of Cardiology; AHA, American Heart Association; GPIIb/IIIa, glycoprotein IIb/IIIa complex; LAD, left anterior descending coronary artery; LCX, left circumflex coronary artery; LMCA, left main coronary artery; PCI, percutaneous coronary intervention; RCA, right coronary artery; TIMI, Thrombolysis in Myocardial Infarction.
